# Supplementary material for: A Modular Mathematical Model of Exercise-Induced Changes in Metabolism, Signaling, and Gene Expression in Human Skeletal Muscle
Source: MDPI journal article supplement (doi:10.3390/ijms221910353), 2021-09-26
Supplement: s1 [file s1]

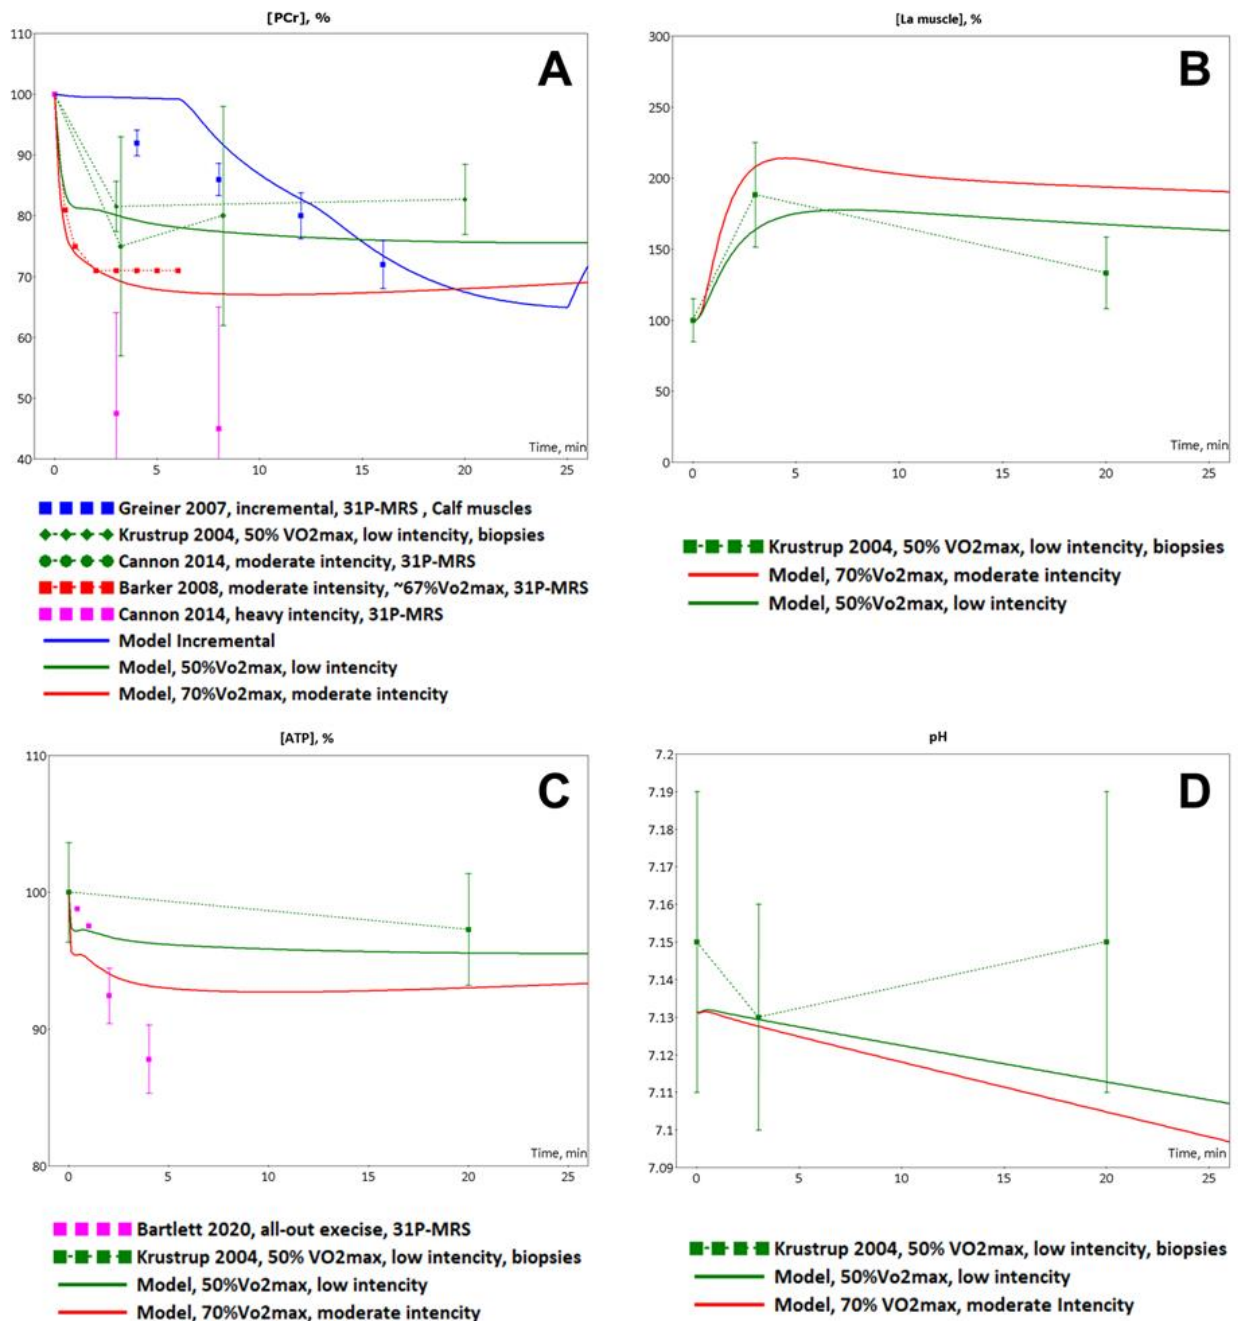

**Supplementary Figure S1. Model validation.** The model simulations were compared to experimental data. (A) Model-predicted dynamic changes of PCr concentration in the muscle during incremental (blue line), low (green line) and moderate intensity (red line) exercises (axis X - time of the exercise in minutes) and experimental measurements of PCr concentration changes during incremental (blue square dots, [1]), low-intensity (green diamond dots, [2]), green circle dots, [3]), moderate intensity (red square dots, [4]) and high-intensity (magenta square dots, [3]) exercises; (B) Model-predicted dynamic changes of lactate concentration in the muscle during low (green line) and moderate intensity (red line) exercises (axis X - time of the exercise in minutes) and experimental measurements of lactate concentration changes during low-intensity (green square dots, [2]) exercise; (C) Model-predicted dynamic changes of ATP concentration in the muscle during low (green line) and moderate intensity (red line) exercises (axis X - time of the exercise in minutes) and experimental measurements of ATP concentration changes during low-intensity exercise (green square dots, [2]) and all-out exercise (magenta square dots, [5]). The set of experimental data for ATP demonstrates lower [2] and upper [5] boundaries for the concentration; (D) Model-predicted dynamic changes of pH in the muscle during low (green line) and moderate intensity (red line) exercises (axis X - time of the exercise in minutes) and experimental measurements of ATP concentration changes during low-intensity (green square dots, [2]) exercise. Experimental data are shown as mean  $\pm$  SD.

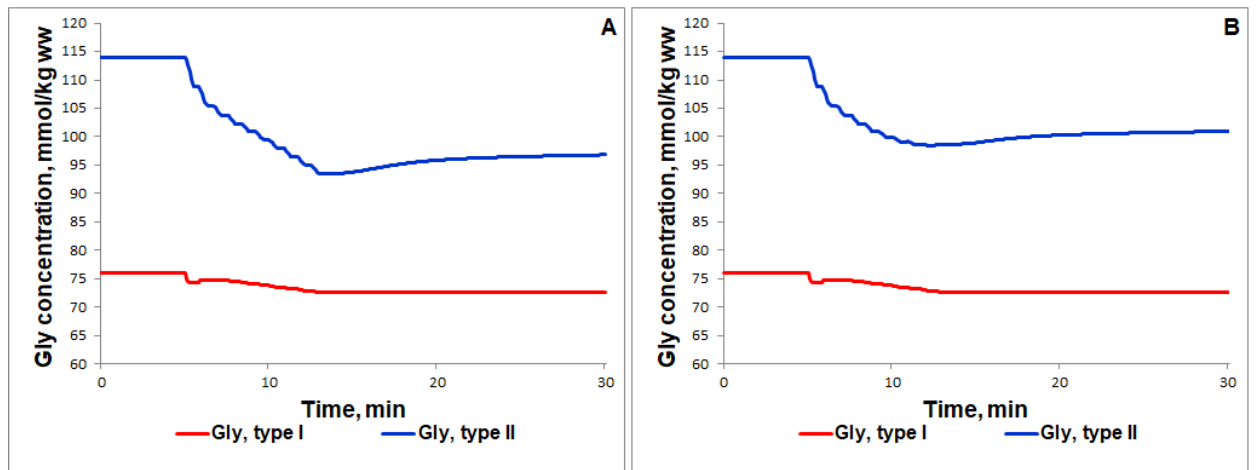

**Supplementary Figure S2.** Simulation results for high-intensity intermittent exercise (each bout of 30-s exercise separated by 20-s recovery, [6]). (F,G) Glycogen concentration in type I (red) and type II fibers (blue) with constant power generated by type II fibers (Figure 10A) and with successive decline of the power generated by type II fibers (Figure 10C), correspondingly.

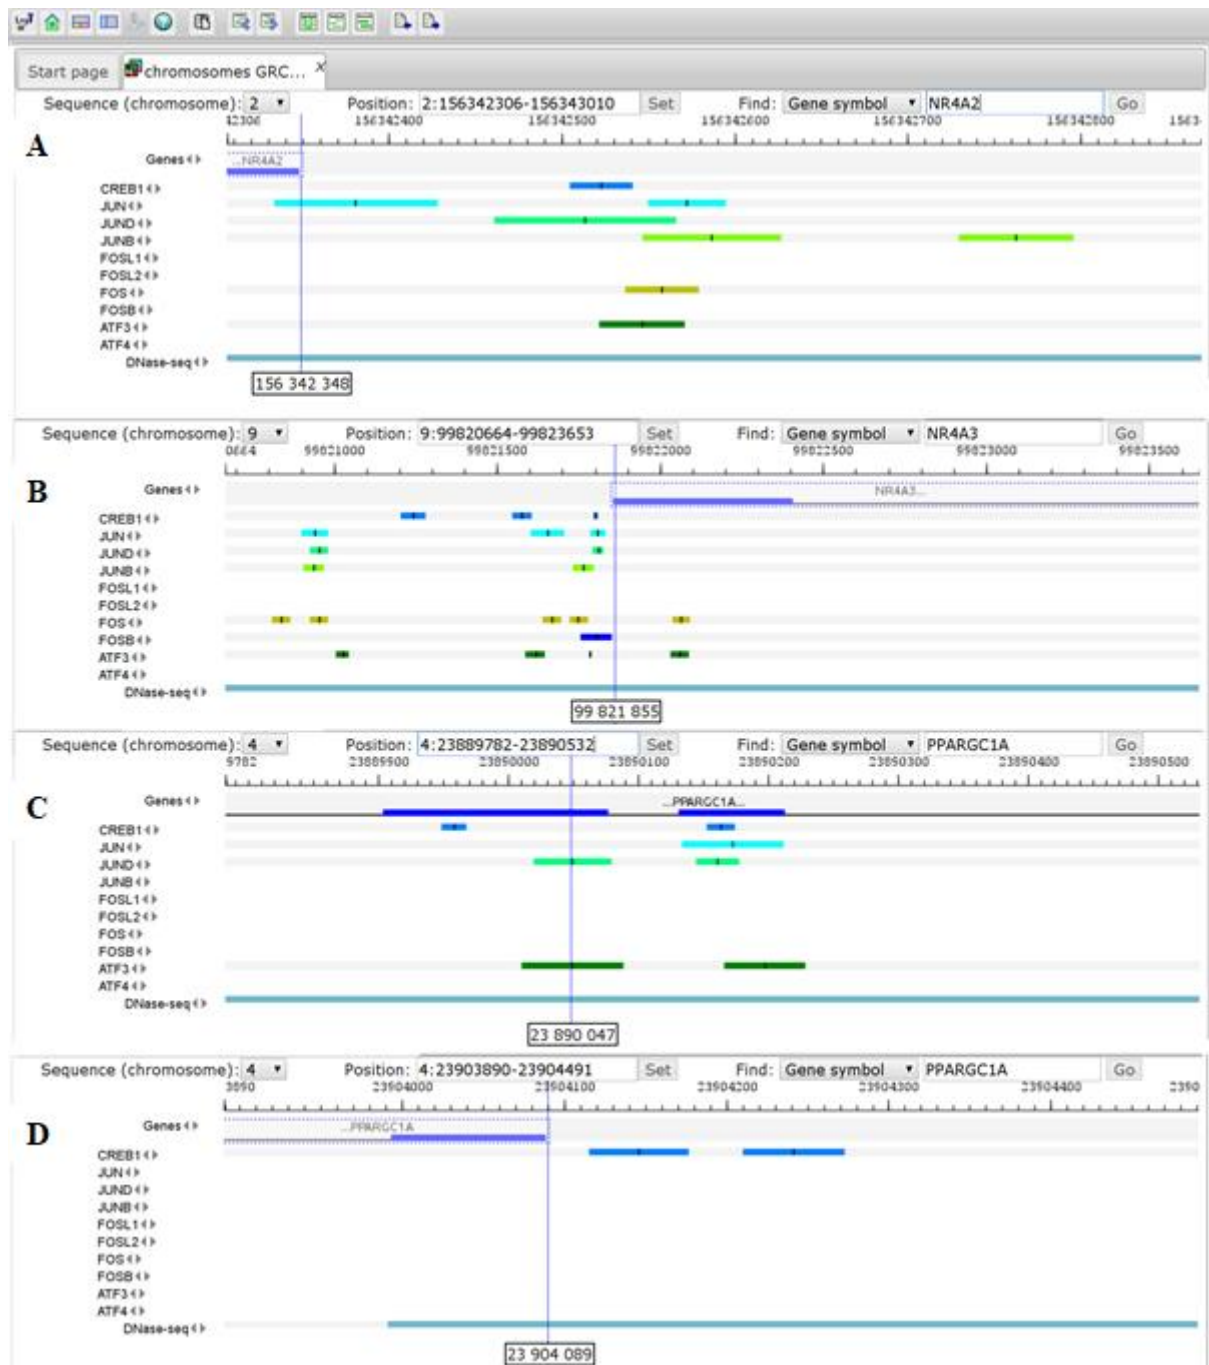

**Supplementary Figure S3.** Binding sites of transcription factors of CREB, FOS and JUN families in promoter loci of the target genes *NR4A2*, *NR4A3* and *PPARGC1A*, known from ChIP-seq experiments, as seen in the GTRD genome browser [7]. Transcription start sites are shown with a vertical dashed line; the exact coordinate of each transcription start is given in a box below: A. Promoter region of the *NR4A2* gene (ENSG00000153234). B. Promoter region of the *NR4A3* gene (ENSG00000119508). C. The region of the canonical promoter of the *PPARGC1A* gene (transcript RefSeq ID NM\_013261, the coordinate of the transcription start is given according to the NCBI annotation, version 109.20190905). D. The region of the alternative promoter of the *PPARGC1A* gene (transcript RefSeq ID XM\_005248132, the coordinate of the transcription start is given according to the NCBI annotation, version 109.20190905).

**Supplementary Table S1.** Binding sites of transcription factors CREB, FOS and JUN in promoter regions of the target genes *NR4A2*, *NR4A3* and *PPARGC1A*, known from ChIP-seq experiments (data from the GTRD database).

| Transcription factor (TF) | Target gene                                  | Transcription start site (TSS) | TF site location, relative to TSS | Reference |
|---------------------------|----------------------------------------------|--------------------------------|-----------------------------------|-----------|
| pCREB1                    | <i>NR4A2</i><br>( <i>ENSG00000153234</i> )   | chr2:156342348                 | -175                              | [7]       |
|                           | <i>NR4A3</i><br>( <i>ENSG00000119508</i> )   | chr9:99821855                  | 612                               | [7]       |
|                           |                                              |                                | -279                              |           |
|                           |                                              |                                | -53                               |           |
|                           | <i>PPARGC1A</i> *<br>( <i>XM_005248132</i> ) | chr4:23904089                  | 58                                | [7]       |
|                           |                                              |                                | -153                              |           |
| JUN                       | <i>NR4A2</i>                                 | chr2:156342348                 | 89                                | [7]       |
|                           |                                              |                                | -117                              |           |
|                           | <i>NR4A3</i>                                 | chr4:23890047                  | -117                              | [7]       |
|                           |                                              |                                | -117                              |           |
|                           |                                              |                                | -117                              |           |
| JUN                       | <i>NR4A2</i>                                 | chr2:156342348                 | -224                              | [7]       |
|                           |                                              |                                | -33                               |           |
|                           | <i>NR4A3</i>                                 | chr9:99821855                  | 915                               | [7]       |
|                           |                                              |                                | -200                              |           |
|                           |                                              |                                | -46                               |           |
| JUND                      | <i>PPARGC1A</i> *                            | chr4:23904089                  |                                   |           |
|                           | <i>PPARGC1A</i> #                            | chr4:23890047                  | -126                              | [7]       |
|                           | <i>NR4A2</i>                                 | chr2:156342348                 | -166                              | [7]       |
|                           |                                              |                                | -166                              |           |
|                           | <i>NR4A3</i>                                 | chr9:99821855                  | -901                              | [7]       |
| JUNB                      | <i>PPARGC1A</i> *                            | chr4:23904089                  | -45                               | [7]       |
|                           |                                              |                                | -45                               |           |
|                           | <i>PPARGC1A</i> #                            | chr4:23890047                  | -3                                | [7]       |
|                           |                                              |                                | -114                              |           |
|                           | <i>NR4A2</i>                                 | chr2:156342348                 | -239                              | [7]       |
| FOSL1                     | <i>NR4A2</i>                                 | chr2:156342348                 | -415                              | [7]       |
|                           |                                              |                                | -415                              |           |
|                           | <i>NR4A3</i>                                 | chr9:99821855                  | -917                              | [7]       |
|                           | <i>PPARGC1A</i> *                            | chr4:23904089                  | -90                               | [7]       |
|                           |                                              |                                | -90                               |           |
| FOSL2                     | <i>PPARGC1A</i> #                            | chr4:23890047                  |                                   |           |
|                           | <i>NR4A2</i>                                 | chr2:156342348                 |                                   |           |
|                           |                                              |                                |                                   |           |
|                           | <i>NR4A3</i>                                 | chr9:99821855                  |                                   |           |
|                           | <i>PPARGC1A</i> *                            | chr4:23904089                  |                                   |           |
| FOS                       | <i>PPARGC1A</i> #                            | chr4:23890047                  |                                   |           |
|                           | <i>NR4A2</i>                                 | chr2:156342348                 | -210                              | [7]       |
|                           |                                              |                                | -210                              |           |
| FOS                       | <i>NR4A3</i>                                 | chr9:99821855                  | -1017                             | [7]       |
|                           |                                              |                                | -901                              |           |
|                           | <i>PPARGC1A</i> *                            | chr4:23904089                  |                                   |           |

|      |                   |                |      |     |
|------|-------------------|----------------|------|-----|
|      |                   |                | -188 |     |
|      |                   |                | -105 |     |
|      |                   |                | -210 |     |
|      | <i>PPARGC1A</i> * | chr4:23904089  |      |     |
|      | <i>PPARGC1A</i> # | chr4:23890047  |      |     |
| FOSB | <i>NR4A2</i>      | chr2:156342348 |      |     |
|      | <i>NR4A3</i>      | chr9:99821855  | 50   | [7] |
|      | <i>PPARGC1A</i> * | chr4:23904089  |      |     |
|      | <i>PPARGC1A</i> # | chr4:23890047  |      |     |
| ATF3 | <i>NR4A2</i>      | chr2:156342348 | -198 | [7] |
|      | <i>NR4A3</i>      | chr9:99821855  | -828 | [7] |
|      |                   |                | -237 |     |
|      |                   |                | -69  |     |
|      |                   |                | -205 |     |
|      | <i>PPARGC1A</i> * | chr4:23904089  |      |     |
|      | <i>PPARGC1A</i> # | chr2:156342348 | -3   | [7] |
|      |                   |                | -151 |     |
| ATF4 | <i>NR4A2</i>      | chr2:156342348 |      |     |
|      | <i>NR4A3</i>      | chr9:99821855  |      |     |
|      | <i>PPARGC1A</i> * | chr4:23904089  |      |     |
|      | <i>PPARGC1A</i> # | chr4:23890047  |      |     |

\* – alternative promoter of the *PPARGC1A*; # – canonical promoter of the *PPARGC1A*.

## References

1. Greiner, A.; Esterhammer, R.; Bammer, D.; Messner, H.; Kremser, C.; Jaschke, W.R.; Fraedrich, G.; Schocke, M.F. High-energy phosphate metabolism in the calf muscle of healthy humans during incremental calf exercise with and without moderate cuff stenosis. *European Journal of Applied Physiology* **2007**, *99*(5), pp.519-531.
2. Krstrup, P.; Soderlund, K.; Mohr, M.; Bangsbo, J. Slow-Twitch Fiber Glycogen Depletion Elevates Moderate-Exercise Fast-Twitch Fiber Activity and O<sub>2</sub> Uptake. *Medicine and Science in Sports and Exercise* **2004**, *36*(6), pp. 973-982.
3. Cannon, D.T.; Bimson, W.E.; Hampson, S.A.; Bowen, T.S.; Murgatroyd, S.R.; Marwood, S.; Kemp, G.J.; Rossiter, H.B. Skeletal muscle ATP turnover by <sup>31</sup>P magnetic resonance spectroscopy during moderate and heavy bilateral knee extension. *The Journal of Physiology* **2014**, *592*(23), pp.5287-5300.
4. Barker, A.R.; Welsman, J.R.; Fulford, J.; Welford, D.; Armstrong, N. Muscle phosphocreatine kinetics in children and adults at the onset and offset of moderate-intensity exercise. *Journal of Applied Physiology* **2008**, *105*(2), pp.446-456.
5. Bartlett, M.F.; Fitzgerald, L.F.; Nagarajan, R.; Hiroi, Y.; Kent, J.A. Oxidative ATP synthesis in human quadriceps declines during 4 minutes of maximal contractions. *The Journal of Physiology* **2020**, *598*(10), pp.1847-1863.
6. Kappenstein, J.; Ferrauti, A.; Runkel, B.; Fernandez-Fernandez, J.; Müller, K.; Zange, J. Changes in phosphocreatine concentration of skeletal muscle during high-intensity intermittent exercise in children and adults. *European Journal of Applied Physiology* **2013**, *113*(11), pp.2769-2779.
7. Kolmykov, S.; Yevshin, I.; Kulyashov, M.; Sharipov, R.; Kondrakhin, Y.; Makeev, V.J.; Kulakovskiy, I.V.; Kel, A.; Kolpakov, F. GTRD: an integrated view of transcription regulation. *Nucleic Acids Research* **2021**, *49*(D1), pp.D104-D111.
